# Supplementary material for: Luminescent Au(iii) organometallic complex of N-confused tetraphenylporphyrin
Source: Royal Society of Chemistry journal article supplement (doi:10.1039/b807922f), 2008-01-01
Supplement: b807922f.pdf [file b807922f.pdf]

## Supplementary Information

For

### Luminescent gold(III) organometallic complex of N-confused tetraphenylporphyrin

Motoki Toganoh, Teppei Niino and Hiroyuki Furuta\*

*Department of Chemistry and Biochemistry, Graduate School of Engineering,  
Kyushu University, 744 Motoooka, Nishi-ku, Fukuoka 819-0395, Japan.*

*Tel/Fax: (+81)92-802-2865*

*E-mail: hfuruta@cstf.kyushu-u.ac.jp*

**General.** Commercially available solvents and reagents were used without further purification unless otherwise mentioned. NBS was recrystallized from hot water. Toluene was distilled over CaH<sub>2</sub>. AuCl•SMe<sub>2</sub> is freshly prepared from HAuCl<sub>4</sub>•4H<sub>2</sub>O and Me<sub>2</sub>S in MeOH. Thin-layer chromatography (TLC) was carried out on aluminium sheets coated with silica gel 60 (Merck 5554). Preparative purifications were performed by flash column chromatography (KANTO Silica Gel 60 N, spherical, neutral, 40–50 μm) or gravity column chromatography (KANTO Silica Gel 60 N, spherical, neutral, 63–210 μm). The <sup>1</sup>H NMR or <sup>13</sup>C NMR spectra were recorded on a JNM-AI SERIES FT-NMR spectrometer (JEOL) at 300 MHz or 75 MHz, respectively. Proton chemical shifts were reported relative to residual proton of deuterated solvent (δ 7.26 ppm for CHCl<sub>3</sub>). Carbon chemical shifts were reported relative to CDCl<sub>3</sub> at δ 77.00 ppm. UV-vis absorption spectra were recorded on a UV-3150PC spectrometer (Shimadzu). Emission spectra were recorded on an SPEX Fluorolog spectrometer (HORIBA). Mass spectra were recorded on an autoflex MALDI-TOF MS spectrometer (Bruker Daltonics). Cyclic voltammetric measurements were performed on a CH Instrument Model 620B (ALS) equipped with a Pt electrode.

#### Synthesis of AuNCTPP (3)

A mixture of 21-Br-NCTPP (16.6 mg, 23.9 μmol, 1 equiv) and AuCl•SMe<sub>2</sub> (23.1 mg, 78.4 μmol, 3.3 equiv) in toluene was refluxed for 11 h. The resulting mixture was dried under reduced pressure and the residue was purified by silica gel column chromatography (MeOH/CH<sub>2</sub>Cl<sub>2</sub> = 1/100) to give **3** in 37% yield (7.1 mg, 8.8 μmol). <sup>1</sup>H NMR (CDCl<sub>3</sub>, 300 MHz, ppm): δ 7.72–7.77 (m, 12H), 8.08–8.19 (m, 8H), 8.64 (d, *J* =

5.2 Hz, 1H), 8.66 (d,  $J = 5.2$  Hz, 1H), 8.68 (d,  $J = 4.9$  Hz, 1H), 8.70 (d,  $J = 4.9$  Hz, 1H), 8.86 (d,  $J = 5.2$  Hz, 1H), 8.94 (d,  $J = 5.2$  Hz, 1H), 9.43 (s, 1H);  $^{13}\text{C}$  NMR ( $\text{CDCl}_3$ , 75 MHz, ppm):  $\delta$  104.07, 119.49, 120.64, 125.46, 126.80, 126.97, 127.13, 127.17, 127.21, 127.61, 127.93, 127.98, 128.12, 129.05, 129.49, 129.62, 129.94, 130.42, 131.18, 133.73, 133.79, 134.09, 134.21, 136.67, 137.53, 138.32, 138.45, 138.87, 139.52, 139.86, 139.93, 141.00, 141.59, 164.40; HRMS (ESI+)  $m/z$ : found: 809.19395, calcd for  $\text{C}_{44}\text{H}_{28}\text{N}_4\text{Au}$  ( $\text{MH}^+$ ): 809.19795; UV-vis ( $\text{CH}_2\text{Cl}_2$ ,  $\lambda_{\text{max}}/\text{nm}$  ( $\epsilon$ )): 435 (144000), 513 (15400), 549 (5600), 636 (8700).

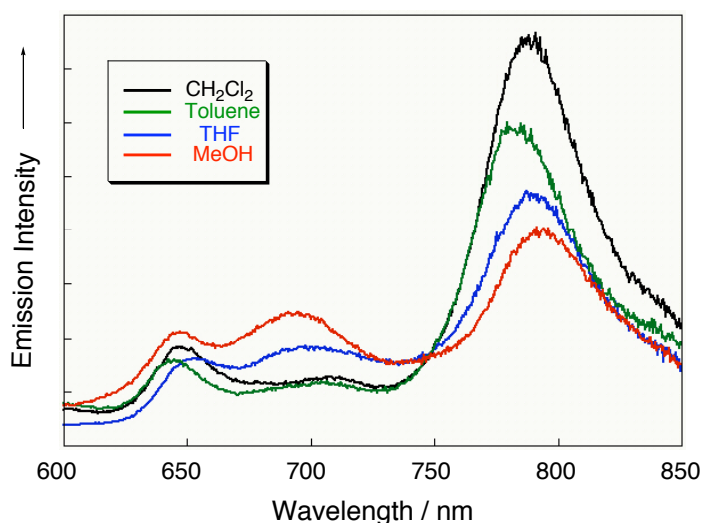

**Fig. S1** Emission spectra of **3** at room temperature (excited at 435 nm).

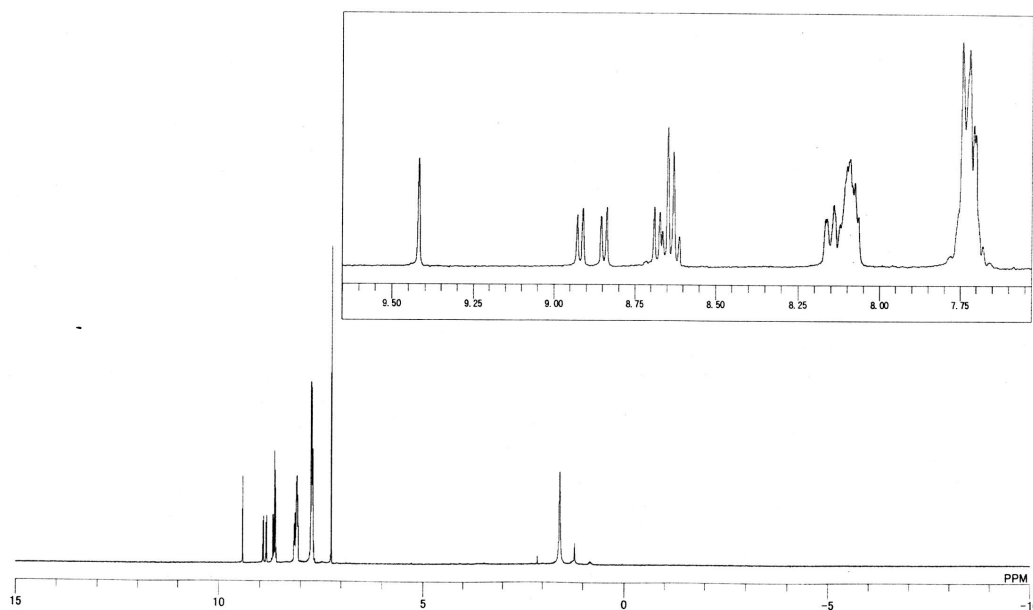

**Fig. S2**  $^1\text{H}$  NMR spectrum of **3** in  $\text{CDCl}_3$  at room temperature.

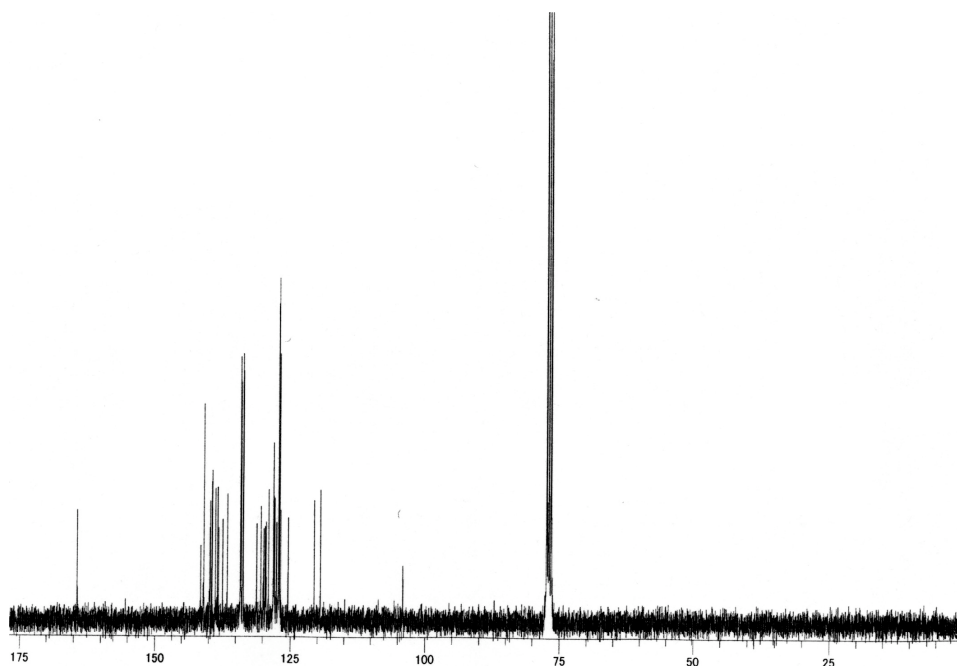

**Fig. S3**  $^{13}\text{C}$  NMR spectrum of **3** in  $\text{CDCl}_3$  at room temperature.

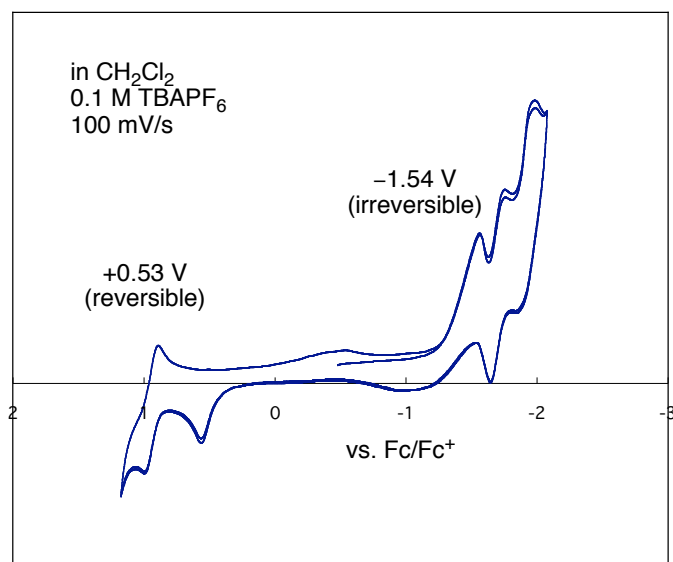

**Fig. S4** Cyclic voltammogram of **3** at room temperature.

**Calculation details.** All the DFT calculations were performed with a Gaussian 03 program package<sup>1</sup> without symmetry assumption. The geometries were fully optimized at the Becke's three-parameter hybrid functional<sup>2</sup> combined with the Lee-Yang-Parr correlation functional<sup>3</sup> abbreviated as the B3LYP level of density functional theory. The SDD basis set<sup>4</sup> was used for Au and the 6-31G\*\* basis sets for C, H and N. This combination was denoted as 631S. The stationary points are verified by the frequency calculations.

### Optimized structure of 3 at B3LYP/631S level

Stoichiometry C44H27AuN4  
Framework group C1[X(C44H27AuN4)]  
Deg. of freedom 222  
Full point group C1  
Largest Abelian subgroup C1 NOp 1  
Largest concise Abelian subgroup C1 NOp 1

Standard orientation:

| Center Number | Atomic Number | Atomic Type | Coordinates (Angstroms) |           |           |
|---------------|---------------|-------------|-------------------------|-----------|-----------|
|               |               |             | X                       | Y         | Z         |
| 1             | 79            | 0           | -0.002247               | -0.003455 | -0.009040 |
| 2             | 6             | 0           | -4.041952               | -1.258604 | -0.049437 |
| 3             | 6             | 0           | -2.610535               | -1.582701 | -0.034149 |
| 4             | 6             | 0           | -2.030828               | -2.858458 | -0.048610 |
| 5             | 6             | 0           | -0.637712               | -3.037406 | -0.029764 |
| 6             | 6             | 0           | 0.039383                | -4.300370 | 0.004031  |
| 7             | 6             | 0           | 1.380970                | -4.056502 | 0.037345  |
| 8             | 6             | 0           | 1.568336                | -2.632634 | 0.037857  |
| 9             | 6             | 0           | 2.827983                | -2.004766 | 0.073742  |
| 10            | 6             | 0           | 3.042955                | -0.623042 | 0.051247  |
| 11            | 6             | 0           | 4.330016                | 0.031310  | 0.101279  |
| 12            | 6             | 0           | 4.106149                | 1.373120  | 0.059051  |
| 13            | 6             | 0           | 2.676905                | 1.571861  | -0.016899 |
| 14            | 6             | 0           | 2.023503                | 2.807297  | -0.067041 |
| 15            | 6             | 0           | 0.625962                | 2.990552  | -0.079546 |
| 16            | 6             | 0           | -0.015566               | 4.268806  | -0.172270 |
| 17            | 6             | 0           | -1.365003               | 4.061511  | -0.136901 |
| 18            | 6             | 0           | -1.592833               | 2.652833  | -0.024277 |
| 19            | 6             | 0           | -2.861873               | 2.033476  | 0.009274  |
| 20            | 6             | 0           | -2.994928               | 0.640927  | -0.010636 |
| 21            | 6             | 0           | -1.970029               | -0.329047 | -0.020307 |
| 22            | 6             | 0           | -2.910521               | -4.065562 | -0.076530 |
| 23            | 6             | 0           | -3.793501               | -4.328550 | 0.983451  |
| 24            | 6             | 0           | -4.627014               | -5.447093 | 0.954754  |
| 25            | 6             | 0           | -4.594640               | -6.319617 | -0.134636 |
| 26            | 6             | 0           | -3.723505               | -6.066763 | -1.195947 |
| 27            | 6             | 0           | -2.888127               | -4.949698 | -1.167503 |
| 28            | 6             | 0           | 4.038599                | -2.889731 | 0.138457  |

|    |   |   |           |           |           |
|----|---|---|-----------|-----------|-----------|
| 29 | 6 | 0 | 4.402899  | -3.516205 | 1.339767  |
| 30 | 6 | 0 | 5.532495  | -4.333624 | 1.401860  |
| 31 | 6 | 0 | 6.314998  | -4.536427 | 0.263328  |
| 32 | 6 | 0 | 5.962135  | -3.917503 | -0.937305 |
| 33 | 6 | 0 | 4.832105  | -3.100240 | -0.999090 |
| 34 | 6 | 0 | 2.880816  | 4.037220  | -0.104923 |
| 35 | 6 | 0 | 3.624174  | 4.354248  | -1.252083 |
| 36 | 6 | 0 | 4.429926  | 5.493516  | -1.286214 |
| 37 | 6 | 0 | 4.505461  | 6.332738  | -0.173183 |
| 38 | 6 | 0 | 3.770570  | 6.026933  | 0.974095  |
| 39 | 6 | 0 | 2.964307  | 4.888451  | 1.007742  |
| 40 | 6 | 0 | -4.076753 | 2.896097  | 0.062338  |
| 41 | 6 | 0 | -5.081329 | 2.787887  | -0.912957 |
| 42 | 6 | 0 | -6.210004 | 3.603304  | -0.862208 |
| 43 | 6 | 0 | -6.364118 | 4.532368  | 0.169361  |
| 44 | 6 | 0 | -5.379815 | 4.639765  | 1.152480  |
| 45 | 6 | 0 | -4.244597 | 3.830139  | 1.097895  |
| 46 | 1 | 0 | -4.851460 | -1.980564 | -0.078749 |
| 47 | 1 | 0 | -0.456844 | -5.259068 | 0.007604  |
| 48 | 1 | 0 | 2.183833  | -4.777295 | 0.063840  |
| 49 | 1 | 0 | 5.278393  | -0.480739 | 0.167145  |
| 50 | 1 | 0 | 4.837101  | 2.167328  | 0.085493  |
| 51 | 1 | 0 | 0.505288  | 5.209378  | -0.264345 |
| 52 | 1 | 0 | -2.146967 | 4.802286  | -0.201924 |
| 53 | 1 | 0 | -3.815818 | -3.655419 | 1.835402  |
| 54 | 1 | 0 | -5.299618 | -5.637685 | 1.786200  |
| 55 | 1 | 0 | -5.244910 | -7.189329 | -0.157235 |
| 56 | 1 | 0 | -3.697393 | -6.736249 | -2.051100 |
| 57 | 1 | 0 | -2.219320 | -4.749513 | -1.999389 |
| 58 | 1 | 0 | 3.796051  | -3.356936 | 2.226540  |
| 59 | 1 | 0 | 5.802308  | -4.809227 | 2.340565  |
| 60 | 1 | 0 | 7.194159  | -5.172527 | 0.311634  |
| 61 | 1 | 0 | 6.564515  | -4.072160 | -1.828045 |
| 62 | 1 | 0 | 4.556636  | -2.621167 | -1.934324 |
| 63 | 1 | 0 | 3.563337  | 3.703877  | -2.119942 |
| 64 | 1 | 0 | 4.995594  | 5.726295  | -2.183986 |
| 65 | 1 | 0 | 5.132637  | 7.219198  | -0.199468 |
| 66 | 1 | 0 | 3.827087  | 6.672724  | 1.845819  |
| 67 | 1 | 0 | 2.395759  | 4.650065  | 1.902018  |
| 68 | 1 | 0 | -4.971684 | 2.057964  | -1.706662 |
| 69 | 1 | 0 | -6.973540 | 3.510344  | -1.629392 |
| 70 | 1 | 0 | -7.247250 | 5.163831  | 0.208859  |
| 71 | 1 | 0 | -5.495140 | 5.350184  | 1.966352  |
| 72 | 1 | 0 | -3.486465 | 3.908556  | 1.871431  |
| 73 | 7 | 0 | -4.272304 | 0.021572  | -0.021897 |
| 74 | 7 | 0 | 0.320214  | -2.031512 | -0.004501 |
| 75 | 7 | 0 | 2.063829  | 0.340372  | -0.013213 |
| 76 | 7 | 0 | -0.360540 | 2.016691  | -0.004939 |

---

## References

- 1 Gaussian 03, Revision D.01, M. J. Frisch, G. W. Trucks, H. B. Schlegel, G. E. Scuseria, M. A. Robb, J. R. Cheeseman, J. A. Montgomery, Jr., T. Vreven, K. N. Kudin, J. C. Burant, J. M. Millam, S. S. Iyengar, J. Tomasi, V. Barone, B. Mennucci, M. Cossi, G. Scalmani, N. Rega, G. A. Petersson, H. Nakatsuji, M. Hada, M. Ehara, K. Toyota, R. Fukuda, J. Hasegawa, M. Ishida, T. Nakajima, Y. Honda, O. Kitao, H. Nakai, M. Klene, X. Li, J. E. Knox, H. P. Hratchian, J. B. Cross, V. Bakken, C. Adamo, J. Jaramillo, R. Gomperts, R. E. Stratmann, O. Yazyev, A. J. Austin, R. Cammi, C. Pomelli, J. W. Ochterski, P. Y. Ayala, K. Morokuma, G. A. Voth, P. Salvador, J. J. Dannenberg, V. G. Zakrzewski, S. Dapprich, A. D. Daniels, M. C. Strain, O. Farkas, D. K. Malick, A. D. Rabuck, K. Raghavachari, J. B. Foresman, J. V. Ortiz, Q. Cui, A. G. Baboul, S. Clifford, J. Cioslowski, B. B. Stefanov, G. Liu, A. Liashenko, P. Piskorz, I. Komaromi, R. L. Martin, D. J. Fox, T. Keith, M. A. Al-Laham, C. Y. Peng, A. Nanayakkara, M. Challacombe, P. M. W. Gill, B. Johnson, W. Chen, M. W. Wong, C. Gonzalez, and J. A. Pople, Gaussian, Inc., Wallingford CT, 2004.
- 2 A. D. Becke, *J. Chem. Phys.*, 1993, **98**, 5648.
- 3 C. Lee, W. Yang and R. G. Parr, *Phys. Rev. B*, 1988, **37**, 785.
- 4 P. Schwerdtfeger, M. Dolg, W. H. E. Schwarz, G. A. Bowmaker and P. D. W. Boyd, *J. Chem. Phys.*, 1989, **91**, 1762.
